# Supplementary material
Source: publisher figshare collection journal article supplement (https://acs.figshare.com/ndownloader/files/11210972)
Supplement: Supplementary file 1 [file 11210972]

## Sheet: P(III)
X=OSiMe3 (OTMS)
Y=OMe
						absolute values
B3LYP/6-31+G**			calc, ppm			calc, J
gas phase calculation						J(P-F)	J(P-H)
			ppm	ppm	ppm	Hz	Hz
		sym	P[31]	F[19]	H[1]
PF3		C3v	95.4885	-29.2746		1224.6
PF2X		Cs	94.106	-32.6	0.894	1082.3	0.6
PFX2		Cs	102.976	-30.85	0.745	972.1	0.4
PX3		C3	99.8933
PF2OH		Cs	118.78	-40.7	5.02	1171.8	26.5
PF(OH)2		Cs	125.34	-25.9	4.11	1061.4	18.1
P(OH)3		C3	121.25		3.46		13.6
PFY2		Cs	140.285	-53.461	4.259	1017.3	12.2
PF2Y		Cs	129.607	-44.73	4.357	1160.4	13.1
PFXY	MeO	C1	112.568	-45.647	4.175	1003.1	11.3	J(Me-F)=1.8
	TMS				0.836		0.5	J(F-TMS)=0.1
PY2X	MeO	Cs	129.03		4.135		11.3
	TMS				0.808		0.6
PY2OH	MeO	Cs	127.03		4.21		11
	OH				4.04		10.1
PY3		C3	143.536		4.104		11.2

## Sheet: P(V)
X=OTMS
Y=OMe								Experiment
B3LYP/6-31+G**			calc, ppm			calc, J		calc, ppm			calc, J
gas phase calculation						J(P-F)	J(P-H)				J(P-F)	J(P-H)
			ppm	ppm	ppm	Hz	Hz	ppm	ppm	ppm	Hz	Hz
		sym	P[31]	F[19]	H[1]			P[31]	F[19]	H[1]
std. PF6-		Oh	-114.23	-70.17		825.8	85
OPF2O-		C2v	-38.3097	-81.2043		951.1	130.3
OPF2(OH)		Cs	-45.7511	-80.5848		951.1
OPF(OH)2		Cs	-32.244	-68.69		995.4
OPF3		C3v	-62.75	-83.79		1136.4
OPXF2		Cs	-52.21	-77.99	0.92	1032.9	0.4
OPX2F		Cs	-45.3996	-69.7508		949.8
OPX3		C3v	-42.2477
OPX2H		Cs	-41.474				604
X2PO2-		C2v	-34.494
OPY3		C3	-19.902		4.293		12.6	-0.6				11
OPY2F		Cs	-30.13	-86.41	4.413	985.4	12.1	-9.4	-85.9		965
OPYF2		Cs	-42.833	-78.77	4.523	1048.5	13.2	-20.1	-86.1		1007
OPY2(OH)	Me		-21.791				11.5
	OH			3.647			2.6
OPYXF	TMS		-44.618	-78.186	0.809	983	0.2
	Me				4.406		12.2
OPYX(OH)	TMS		-34.956		0.78		0.2
	Me				4.417		11.7
	OH				3.731		3.8
OPY2X	TMS		-32.255		0.759		0.2
	Me				4.292		13.6

## Sheet: PF6- species
B3LYP/6-31+G**			calc, ppm			calc, J			exp, shift		exp, J
gas phase calculation						J(P-F)	J(H,F-F)	J(P-P)			J(P-F)	J(H,F-F)	J(P-P)
			ppm	ppm	ppm	Hz	Hz	Hz	ppm	ppm	Hz	Hz	Hz
		sym	P[31]	F[19]	H[1]				P[31]	F[19]
std. PF6-		Oh	-114.23	-70.17		825.8	85		-114.23	-70.17	706
PO2F2-		C2v	-38.3097	-81.2043		951.1	130.3		-15.81	-78.56	948.3
HOP(O)F2		Cs	-45.7511	-80.5848		951.1			-21.6	-83.35	930-960
(HO)2POF		Cs	-32.244	-68.69		995.4			-7.3	-71.64	911.6
									-10.6	-75.76	926
			P[31]	F[19]	H[1]	PF	FF	PP
PF6-		Oh	-114.23	-70.17		825.8	85		-114.23	-70.17	711
PF5X-	eq	Cs	-117.99	-63.54		800.9	88.4
	ax			-56.9		805	88.4
PF4X2-	ax	C2	-118.194	-44.2		782.8	94.5
	eq			-43.05		771.8	94.5
PF4X2-	eq	Ci	-118.93	-44.26		763.1	89.3 (ee')
PF3X3-		C3	-121.9	-29.4		745.8	75.9
			P[31]	F[19]	H[1]	PF	FF	PP
PF5[a]OP[b]O3H2-	ax	Cs	-122.984	-55.68		856.3		47.2
	b		-40.474			5.1(eq), 15.9 (ax)		47.2
	eq			-61.5		820.7
P[a]F3X2OP[b]O3H2-	ax	Cs	-126.524	-31.88		797, 7.4	102.3, 50.6 (aa)	55.4
	eq		-37.724	-28.64		656.9, 4	102.3	55.4
P[a]F5OP[b]F5=	eq	Cs	-122.76	-59.86		781.9, 9.3 (b)		33.7
	ax			-58.9		805.4, 5.9 (b)
	b		-120.2					33.7
F2P[b](O)OP[a]F5-	eq	Cs	-120.332	-54.726		879.1, 3.4 (b)	96.6	48.9
	ax			-77.598		856.6	96.6
	b		-57.006	-80.1		1037.5, 0.1(ax),2.3(eq)	1.7 (eq), 0.9 (ax)
FXP[b](O)OP[a]F5-	eq	Cs	-122.148	-56.13		859.3, 5.1 (b)	91.3	49.7
	ax			-73.03		849.3	91.3
	b		-53.005	-76.902		964.7, 2.0 (eq)	0.3 (ax), 1.9 (eq)
X2P[b](O)OP[a]F5-	eq	Cs	-121.635	-56.753		845.1	90.3	50.8
	ax			-69.939		846.7	90.3
	b		-51.511			0.1(ax), 2.3 (eq)
FP[b](O)(OP[a]F5-)2	eq	Cs	-120.83	-57.401		791.6, 4.1 (b)	84.9	14.9
	ax			-70.526		844.2	84.9
	b		-55.53	-74.634		977.4, 0.1(ax),4.1(eq)	0.8 (eq), 0.2 (ax)

## Sheet: PF5-PXYZ
X=OSiMe3
B3LYP/6-31+G**			calc, ppm		calc, J			exp, shift		exp, J
gas phase calculation					J(P-F)	J(H,F-F)	J(P-P)			J(P-F)
			ppm	ppm	Hz	Hz	Hz	ppm	ppm	Hz
		sym	P[31]	F[19]				P[31]	F[19]
std. PF6-		Oh	-114.23	-70.17	825.8	85		-114.23	-70.17	706
PO2F2-		C2v	-38.3097	-81.2043	951.1	130.3		-15.81	-78.56	948.3
HOP(O)F2		Cs	-45.7511	-80.5848	951.1			-21.6	-83.35	930-960
(HO)2POF		Cs	-32.244	-68.69	995.4			-7.3	-71.64	911.6
PF5, axial		D3h	-75.134	-51.8	948.1	4.5(aa)		-80.3		938
equatorial			-75.134	-59.2	1101.9	265.5(ae), 35.6(ee)
								-10.6	-75.76	926
P[a]F5…M complexes			P[31]	F[19]	PF	FF	PP
pyridine	1a	C2v	-120.1	-82.93	931.1	113.7(b) 92.7 (c)		-145.6	56.4	789	dq
equatorial	2b			-70.48	921.9	113.7(a)135.3 (c)
equatorial (in plane)	2c			-44.44	898.3	92.7(a) 135.3 (b)
mean equatorial				-57.46	910.1	113.9			73.8	757	dd
EC, axial			-86.5	-96.82	943.9	145.767					q
mean equatorial				-38.1025	1006.8	145.767					d
P[a]F5•••P[b]^^^	subunit		P[31]	F[19]	PF	FF	PP	R(PP), Ang
PF3, PF(OH)2, and PF2(OH) - all dissociate
(OH)3	a		39.91		236.3 (eq), 3.6 (ax)		658.3	2.29
axial	b		-125	-81.56	1001	108.3	658.3
mean equatorial	b			-44.1525	872.2	108.3
F2X	a		30.03		1368, 342.7 (eq), 5(ax)		539.7	2.41
axial	b		-107.23	-89.25	981.8, 34.1 (a)	116 (eq), 1.5 (a)	539.7
mean equatorial	b			-27.69	931.1	116 (ax), 27.8 (a)
F	a			-68.7		115.9 (aa')
FX2	a		11.16		1225.8, 285.8 (eq), 4.6 (a)	107.8 (eq), 0.6 (a)	831	2.32
axial	b		-119.28	-81.34	964.5, 75 (a)	107.8 (ax), 22.2 (a)	831
mean equatorial	b			-39.5	903.4
F	a			-68.48
X(OH)2	a		22.46		222.5 (eq), 3.5 (ax)		752.5	2.284
axial	b		-126.46	-78.4	987.9	104.1	752.5
mean equatorial	b			-46.5	879.2	104.1
(OH)2O-	a		-3.01		165.9 (eq), 2.6 (ax)		883.4	2.28
axial	b		-117.08	-68.5	886.2	93.3	883.4
mean equatorial	b			-55.285	942.875	93.3
(OH)FO-	a		3.9		1105, 200.7 (eq), 3.2 (ax)		956.2	2.29
axial	b		-120.2	-72.3	881.6, 139.2 (a)	98.4 (eq), 2.4 (a)	956.2
mean equatorial	b			-50.5	924.7	98.4 (ax), 27.3 (a)
F	a			-65.6		2.4 (ax), 27.3 (eq)
XFO-	a		-2.17		1144.1(b), 223.7 (eq), 3.8 (ax)		1059.8	2.28
axial	b		-121.99	-72.73	868.6, 155.7 (a)	97.4 (eq), 0.2 (a)	1059.8
mean equatorial	b			-50.8	924.9	97.4 (ax), 26.9 (a)
F	a			-67.9	26.9 (eq), 0.2 (ax)
F2O-	a		5.13		1222, 250 (eq) 4.2 (ax)		989.3	2.29
axial	b		-120.9	-76.7	877.8, 122.2 (a)	105 (eq), 2.5 (a)	989.3
mean equatorial	b			-45.72	913.7	105 (ax), 31.1 (a)
F	a			-65.9		122.2 (bb')
X2O-	a		-16.59		196.6 (eq), 3.2 (ax)		1084.2	2.28
axial	b		-121.43	-68.76	867.2	94.7
mean equatorial	b			-54.17	945.7	94.7
X2OH	a		8.22		233.3 (eq), 3.8 (ax)		871.7	2.2866
axial	b		-125	-76.97	971.7	102.4
mean equatorial	b			-47.23	890.8	102.4
P[b]F5OP[a]^^ complexes			P[31]	F[19]	PF	FF	PP
X2	a		103.06		3.8(ax), 20.9(eq)		3.2	3.04
axial	b		-119.991	-66.333	854.2	94
mean equatorial	b			-53.748	820.3	94
F2	a		116.402		3.5 (ax), 20.0 (eq)	17 (aa')	2.6
axial	b		-122.165	-71.309	850	92.2
mean equatorial	b			-51.826	841.2	92.2
F	a			-44.697	1065.1, 2.2 (b)	3.2 (eq), 0.7 (ax)
XF	a		108.745		3.2 (ax), 19.1 (eq)		6.2
axial	b		-121.11	-69.611	849.9	91.7
mean equatorial	b			-54.272	833.3	91.7
F	a			-41.08	995.4, 3.0 (b)	2.7 (eq), 0.8 (ax)
FP(OPF5-)2	a		118.03		3.5 (ax), 17.1 (eq)		2.5
axial	b		-119.149	-66.616	783.3	81.4
mean equatorial	b			-55.758	822.9	81.4
F	a			-50.842	1006.8, 2.5 (b)	0.8 (eq), 0.8 (ax)

## Sheet: PF5-P(OH)3 geometry
b3lyp/6-31+G**
	rPP	symm	energy	De	P[a]-Feq	P[a]-Fax	P[b]_OH	P[b]-O-
	Ang		Hartree	eV	Ang	Ang	Ang
P[a]F5...P[b](OH)3	2.292		-1409.64	0.680007	1.65	1.591	1.597
P(OH)3		C3	-568.899				1.656
PF5		D3h	-840.712		1.5737	1.606
PF5		C4v	-840.669	1.172	1.59	1.5522
w 90 deg		C4v	-840.609	2.80434	1.6095	1.5948
	rPP	symm	energy	De	P[a]-Feq	P[a]-Fax	P[b]_OH	P[b]-O-
	Ang		Hartree	eV	Ang	Ang	Ang
P[a]F5...P[b](OH)2O-	2.28		-1409.15	2.29152	1.675	1.632	1.64	1.488
P(OH)2O-		Cs	-568.357				1.738	1.546
PF5		D3h	-840.712		1.5737	1.606
constrained model (C4v symmetry for PF5 fragment and C3v for P(OH)3 fragment)
	rPP	P[a]-Feq	P[a]-Fax	P[b]_O
P[a]F5...P[b](OH)3	Ang	Ang	Ang	Ang
	2.1	1.6505	1.5902	1.5922
	2.125
	2.15
	2.175
	2.2
	2.225
minimum	2.2376	1.6434	1.5877	1.5963
	2.25
	2.275
	2.3
	2.325
	2.35
	2.375
	2.4
	2.425
	2.45
	2.475	1.6283	1.584	1.6069
minimum = 2.237 ± 0.000 Å
diss. energy = 1.183 ± 0.028 eV
a = 0.461 ± 0.006 Å
force constant k= 11.124 eV/Å^2
hwe = 30.61 meV, xe=6.47e-03
T=295.0 K => hwe/kT = 1.20
corrected diss. energy = 1.168 eV

## Sheet: P-F miscellany
X=OSiMe3
						absolute values
B3LYP/6-31+G**			calc, ppm			calc, J			exp, shift		exp, J
gas phase calculation						J(P-F)	J(H,F-F)	J(P-P)			J(P-F)	J(H,F-F)	J(P-P)
			ppm	ppm	ppm	Hz	Hz	Hz	ppm	ppm	Hz	Hz	Hz
		sym	P[31]	F[19]	H[1]				P[31]	F[19]
PF3		C3v	95.4885	-29.2746		1224.6	3		97
XPF2		Cs	94.106	-32.6		1082.3			-33.5	113.2	1032
X2PF		Cs	102.976	-30.85		972.1
X3P		C3	99.8933
PF2OH		Cs	118.78	-40.7		1171.8
PF(OH)2		Cs	125.34	-25.9		1061.4
P(OH)3		C3	121.25
HP(O)(OH)2 isomer		Cs	-26.29				630.2
O(PF2)2		C2	94.67	-27.33		1167.8	14.1	49.2
				-33.3		1157.7, 31.2	14.1
F2POPO3H2		Cs	86.49	-34.34		1178.7, 16.8		23.8
			-54.15			16.8		23.8
			P[31]	F[19]	H[1]	PF	FF	PP
OPF3		C3v	-62.75	-83.79		1136.4			-36.3	-88.1	1066
OPXF2		Cs	-51.7136	-77.9623		1032.89	12		-25	-72.6	928
									-17.8	-84	980	Winter
OPX2F		Cs	-45.3996	-69.7508		949.8			-27.1	-73.3	925	Winter
OPX3		C3v	-42.2477
X2P(O)H		Cs	-41.474			604
X2PO2-		C2v	-34.494
			P[31]	F[19]	H[1]	PF	FF	PP
O(POF2)2		Cs	-68.2496	-74.3085		1108, 1.8					1063
OP(OX2)2		C2	-49.674
OP(OXF)2		C2	-59.7716	-72.9581		1010.8, 4.4	2.2	70	-32.3	-71	972, 2.2, 2.3		7.6
[XFP[a](O)O]2P[b]F(O)	a	C2							-33.4	-69.7	986		6.7, 2.5
	b								-38.3	-70.4	1015, 6.7, 3.5
PF5 species			P[31]	F[19]	H[1]	PF	FF	PP
PF5, axial	ax	D3h	-75.134	-51.8		948.1	4.5(aa)		-80.3		938
	eq		-75.134	-59.2		1101.9	265.5(ae), 35.6(ee)
XPF4, eq	eq	C1	-77.464	-59.85		1048.1	226.8
	ax			-45.92		830.7, 24	226.8
XPF4	ax	Cs	-84.98	-44.34		820.7	207.9
	eq			-57.47		1050.4	207.9
X2PF3	eq	Cs	-97.814	-71.57		974.9	146.4
	ax			-45.75		716.8	146.4
PF2X3	ax	C3	-82.624	-18.42		641.6	10.5 (aa)
O(PF4)2	ax	C2		-31.87		915.8	249.2
	eq			-55.74		1106	249.2
			P[31]	F[19]	H[1]	PF	FF	PP
(PF2)2		C2	227.446	-115.29		1019.9, 36	16(v), 49,307	198		-114	1194
[P(O)(OH)2]2		C2	-21.464					354.2
			P[31]	F[19]	H[1]	PF	FF	PP
MePO3H		Cs	-24.6		1.84667		9
MePOF2		Cs	-8.95	-62.01	2.17667	1066.7, 4.7,10.7	14
PF4OSiFMe2		Cs	-80.27	-146.3		25	4.1 (a), 13 (eq)
	ax			-41.71		844	230.2
	eq			-56.77		1063.9	230.2
PF4OSiHMe2		Cs	-78.49			1.2 (PH)
	ax			-42.93		834.6	226.7
	eq			-57.16		1049.6	226.7
OPF2OSiFMe2	1	Cs	-63.72	-145.76		1.6
	2			-79.1		1040.7	156
OPF2OSiHMe2	2	Cs	-63.72	-79.42		1031.8, 2.7 (H)
OPF2SiHMe2	2	Cs	14.27	-45.05		1158.8	3
OPF2SiFMe3	2	Cs	4.24	-50.35		1176.6	1.9
	1			-179.53		50.5	1.9
P-P species			P[31]	F[19]	H[1]	PF	FF	PP
(POF2)2		C2h	-42.4	-55.46		1196, 119		514.8
(POF2)2		C2	-42.78	-54.82		1221.7, 111.4	22.5	516.3
				-55.44		1200, 119.2	22.5
(PO2F-)2		C2	-12.65	-55.55		956.8, 154.2	33.2	423.3
(P(O)FOH)2		C2	-29.31	-67.83		1145.8, 124.9	22.4	496.7
(POFX)2		C2	-34.75	-59.99		1115, 130.7		537.4
(POFX)2		Ci	-34.99	-58.68		1076.6,150.4		558.8
F2P[a](O)P[b](O)FOH	a		-35.83	-58.67		1217.7, 145.7 (b)	24.9	504.9
	b		-35.18	-61.76		1139.7, 102.8 (a)	24.9	504.9
F2P[a](O)P[b](O)FO-	b		-39.29	-44.07		968, 34.5 (a)	40.4	222.9
	a		-2.94	-64.94		1237.2, 238.4 (b)	40.4	222.9
F2P[a](O)P[b](O)FX	a		-32.75	-60.76		1206.9, 165.2 (b)	35.9	521.7
	b		-43.32	-50.87		1089.8, 101 (a)	35.9	521.7
			P[31]	F[19]	H[1]	PF	FF	PP
F5PPF2-	ax		-117.25	-70.07		865.3,52.2(b)	96.3,3 .1 (b)	290.5
	b		262.29	-107.67		966.6, 62.3 (e), 4.6 (a)		290.5
	eq			-65.45		1006.6	96.3, 5.8 (b)
F5PPX2-	ax		-111.56	-63.69		870.7	81.7	601.2
	b		135.77	-107.67		5.2 (a) 14.8 (e)		601.2
	eq			-62.3845		1116.1	81.7
F4PP(O)(OH)2	ax		-51.67	-29.35		1000.6	181.3	657.2
	b		-30.76			112.9 (a), 14.1 (e)		657.2
	eq			-65.12		1195.9	181.3
